# Supplementary material
Source: PubMed Central journal article supplement (PMC4631388)
Supplement: NIHMS667659-supplement-01.pdf [file NIHMS667659-supplement-01.pdf]

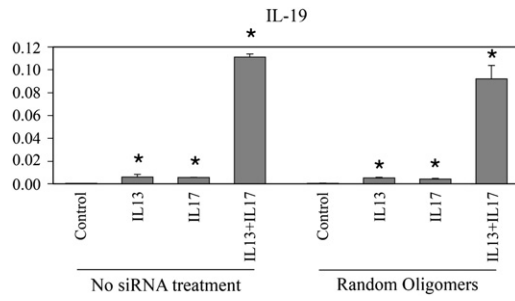

**FIG E1.** NHBE cells treated with and without random oligomers (200 nmol/L) were compared for IL-19 expression. Results indicated *IL-19* was induced equally in both control studies by IL-13, IL-17A, and their cotreatment, suggesting the siRNA effect in Fig 5 is specific. The experiments were repeated 3 times.  $*P < .01$  for cytokine-treated samples and their non-cytokine-treated controls.

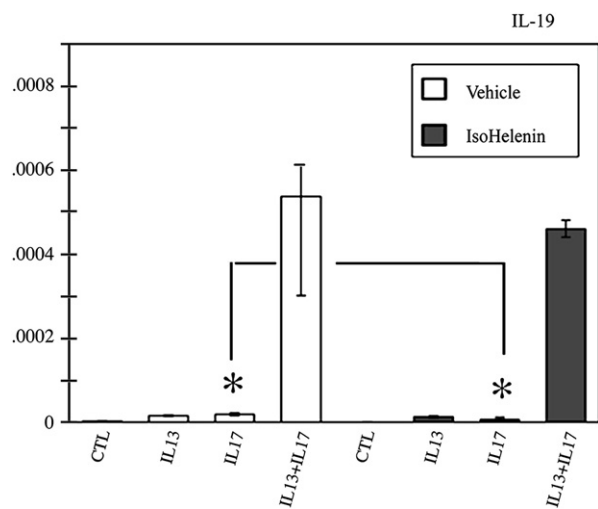

**FIG E2.** Isohelenin, an  $I\kappa B-\alpha$  degradation inhibitor, was shown to suppress IL-17A-induced *IL-19* and *HBD-2* expression. However, isohelenin had no effect on IL-13 or IL-13/IL-17A cotreatment-induced *IL-19* expression. The data were from 3 experiments. \* $P < .05$ , as indicated by the line. CTL, Control.

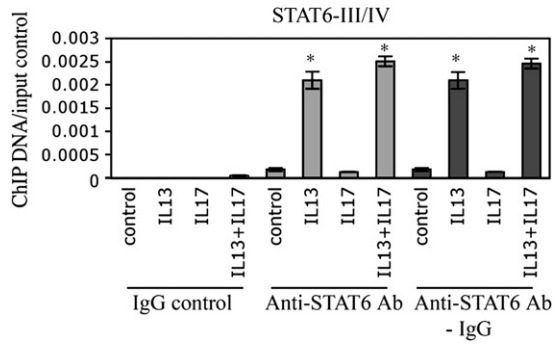

**FIG E3.** In ChIP assays (Fig 6, C) the cycle threshold values of STAT6-III/IV real-time PCR were first normalized to their input controls, and then the normalized values for the negative IgG controls (*left*) were subtracted from the normalized values for the anti-STAT6 immunoprecipitation (*middle*), yielding the final value shown at *right*. \* $P < .05$  for comparable non-cytokine-treated controls. *Ab*, Antibody.
